# Supplementary material
Source: PubMed Central journal article supplement (PMC3345137)

**Supplemental Table 1. Apparent First Order Rate Constants for Inactivation of CES2 by Increasing Concentrations of Paraoxon**

| Paraoxon (nM) | $k_{\text{obs}}$ ( $\text{s}^{-1}$ ) | $k_{\text{obs}}$ (corrected) ( $\text{s}^{-1}$ )* |
|---------------|--------------------------------------|---------------------------------------------------|
| 0             | $2.99 \times 10^{-4}$                | 0                                                 |
| 200           | $1.73 \times 10^{-3}$                | $1.43 \times 10^{-3}$                             |
| 400           | $2.05 \times 10^{-3}$                | $1.75 \times 10^{-3}$                             |
| 600           | $2.99 \times 10^{-3}$                | $2.69 \times 10^{-3}$                             |
| 800           | $3.85 \times 10^{-3}$                | $3.55 \times 10^{-3}$                             |
| 1000          | $5.06 \times 10^{-3}$                | $4.76 \times 10^{-3}$                             |
| 1500          | $7.48 \times 10^{-3}$                | $7.18 \times 10^{-3}$                             |
| 2000          | $8.92 \times 10^{-3}$                | $8.62 \times 10^{-3}$                             |

\*  $k_{\text{obs}}$  (corrected) was calculated by subtracting the  $k_{\text{obs}}$  value determined when paraoxon was 0 nM from the  $k_{\text{obs}}$  value determined at each concentration of paraoxon.

## Figure Legends

### **Supplemental Figure 1. Determination of the bimolecular rate constant for CES2 and**

**paraoxon.** The corrected observed rate constant  $k_{\text{obs}}(\text{corr})$  was plotted versus paraoxon concentration and the slope of the line ( $k_{\text{inact}}/K_I'$ ) was determined.  $k_{\text{inact}}/K_I'$  is the apparent bimolecular rate constant  $k_i'$ . The true bimolecular rate constant  $k_i$  was calculated as described in the Materials and Methods section.

## Supplemental Figure 1

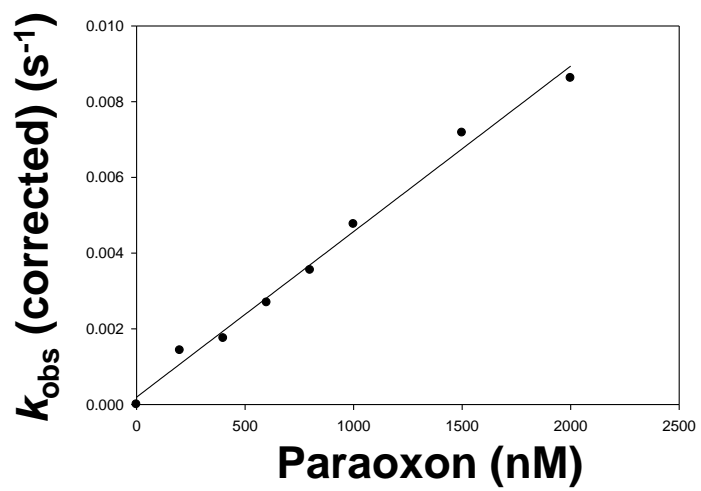

Supplement: NIHMS336554-supplement-1.pdf [file NIHMS336554-supplement-1.pdf]
